# Supplementary material for: Screening of Ni based catalysts supported on metal oxides for liquid-phase hydrogenation of furfural to furfuryl alcohol
Source: Royal Society of Chemistry journal article supplement (doi:10.1039/d3nj02140h), 2023-01-01
Supplement: d3nj02140h1.pdf [file d3nj02140h1.pdf]

## Supplementary Information

### Screening of Ni based catalysts supported on metal oxides for liquid-phase hydrogenation of furfural to furfuryl alcohol

Jingbo Qi,<sup>\*a</sup> Yanbiao Ren,<sup>a</sup> Lincai Zhang<sup>a</sup> and Xun Hu<sup>\*b</sup>

<sup>a</sup> College of Chemistry Chemical Engineering and Material Science, Zaozhuang University, Zaozhuang, Shandong 277160, China

<sup>b</sup> School of Material Science and Engineering, University of Jinan, Jinan, Shandong 250022, China

\*Corresponding author,

E-mail address: [qi\\_jingbo@uzz.edu.cn](mailto:qi_jingbo@uzz.edu.cn) (J. Qi), [xun.hu@outlook.com](mailto:xun.hu@outlook.com) (X. Hu)

## Materials

Al<sub>2</sub>O<sub>3</sub> (99.99% metals basis,  $\gamma$  phase, 20 nm) was purchased from Aladdin Industrial Corporation, SiO<sub>2</sub> (99%, 20 nm), ZrO<sub>2</sub> (>99%, 20-40 nm), TiO<sub>2</sub> (99%, 15-25 nm) and MgO (98%, 20 nm) were purchased by XFNANO, Inc. Ni(NO<sub>3</sub>)<sub>2</sub>·6H<sub>2</sub>O (AR,  $\geq$ 98.0%), FAL (AR,  $\geq$ 99.0%) and isopropanol (AR,  $\geq$ 99.7%) were supplied from Sinopharm Chemical Reagent Co., Ltd. All chemicals were used without purification.

## Catalyst characterization

The mass losses and the physicochemical changes of the precursors after impregnation in heat treatment were identified by Thermogravimetry-differential thermal analysis (TG-DTA) experiments using a HENVEN HCT-1 instrument. For each test, about 10 mg of the sample was placed in an alumina crucible and then introduced inside the furnace. All the samples were analyzed in the temperature interval 40-800°C, with a nominal heating rate of 10°C/min.

The crystal structures of the catalysts were analyzed by using a X-ray diffractometer (Rigaku Ultima IV, Cu K $\alpha$  target,  $\lambda$ =1.5406 Å) at 40 kV/100 mA on a spinner in the range of  $2\theta$ =5-80° with a step size of 0.02°.

X-ray photoelectron spectroscopy (XPS) spectra were recorded using a Thermo ESCALAB 250XI spectrometer with Al-K $\alpha$  radiation ( $h\nu$  =1486.6 eV). Binding energies were determined with the adventitious carbon (C 1s at 284.8 eV) as the reference.

Transmission electron microscopy (TEM) images and energy dispersive X-ray spectroscopy (EDS) mapping were taken by a FEI Tecnai G2 F20. Prior to the measurement, the samples were prepared by depositing a drop of an ultra-sonicated methanol suspension of the solid material onto a carbon-coated Cu grid for TEM measurement.

N<sub>2</sub> adsorption-desorption isotherms were recorded at 77 K using a Micromeritics ASAP-2010 instrument. Before the adsorption of N<sub>2</sub>, the catalysts were outgassed at 200°C for 2 h to remove moisture and some gases physically adsorbed on/in the porous structure and surface of the catalyst. Specific surface areas of the sample were calculated according to the Brunauer-Emmett-Teller (BET) method. The t-plot was applied to evaluate the external surface area and micropore volume. Pore size distributions and mesoporous volume were estimated by the Barrett-Joyner-Halenda (BJH) and micropore (MP) methods.

H<sub>2</sub>-temperature programmed reduction (H<sub>2</sub>-TPR) patterns of the catalysts after calcination were recorded by employing Vodo VDSorb-91i instrument. The fresh catalysts after calcination (ca. 50 mg but precisely weighted) were loaded in a U-shaped quartz reactor, and the sample was held by using quartz wool. After that, the sample was heated from room temperature to 850 °C (heating rate of 10 °C/min) under a 10 vol% H<sub>2</sub>/Ar with a flow rate of 15 mL/min. The final signal (hydrogen consumption) was recorded by a thermal conductivity detector (TCD).

CO<sub>2</sub>-temperature-programmed desorption (CO<sub>2</sub>-TPD) was carried out to determine the basicity of catalysts using Vodo VDSorb-91i instrument. Approximately 50 mg of sample was pretreated in He flow (20 mL/min) at 500 °C for 1 h (10 °C/min). The reaction temperature was lowered to 50 °C and a pure CO<sub>2</sub> stream (20 mL/min) was subsequently introduced into the reactor for 2 h. The CO<sub>2</sub>-TPD was conducted between 50 and 900 °C, under a He flow (10 °C/min and 20 mL/min) and the amount of CO<sub>2</sub> evolved was analyzed using a thermal conductivity reaction (TCD).

H<sub>2</sub> pulse chemisorption measurements was also conducted in Vodo VDSorb-91i instrument. First, Approximately 100 mg of the sample was loaded in a quartz tube and reduced at corresponding temperature under the flow of 10 vol.% H<sub>2</sub>/Ar (20 mL/min) for 5 h. The gas flow was then switched over to pure Ar (20 mL/min) for 1 h to remove traces of hydrogen from the catalyst and entire flow path and then the sample was cooled down to 40 °C. Pulses of 0.4 mL 10 vol.% H<sub>2</sub>/Ar were injected by quantitative loop connected with the six-way valve till saturation (three consecutive H<sub>2</sub> peaks were similar). The area of peaks was used to calculate the total volume of H<sub>2</sub> chemisorbed; which was further used to calculate Ni metal dispersion based on the assumption that H<sub>2</sub>/Ni stoichiometry is equal to 2.

## Figures

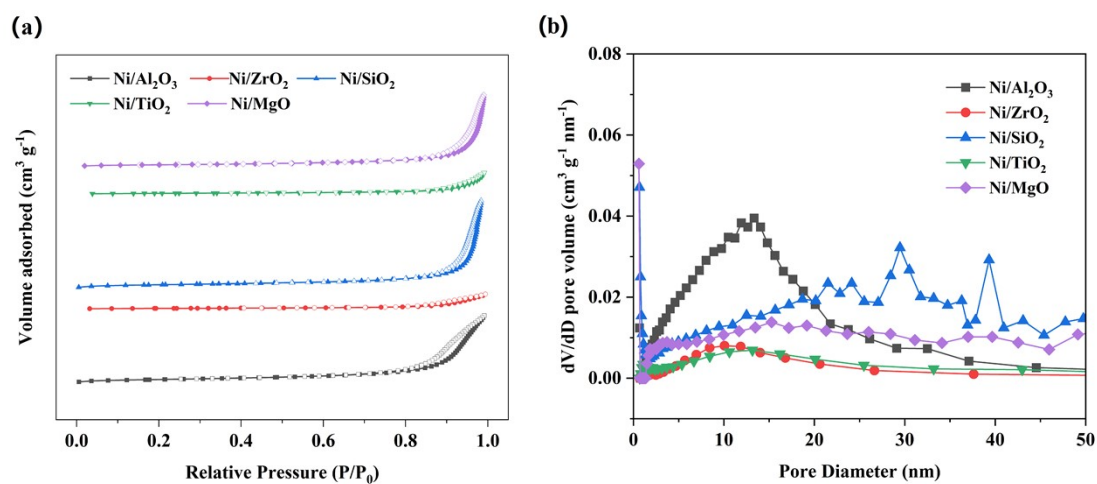

**Fig. S1** The results of N<sub>2</sub> adsorption-desorption on the catalysts at 77 K, (a) N<sub>2</sub> adsorption-desorption isotherms and (b) pore-size distributions.

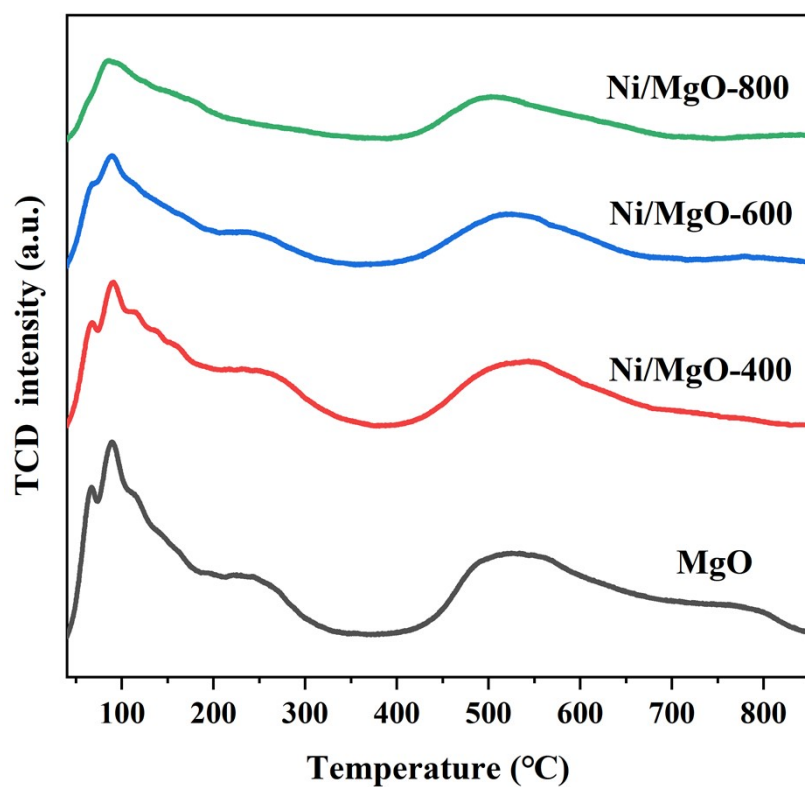

**Fig. S2** CO<sub>2</sub>-TPD profiles of MgO and Ni/MgO catalysts reduced by H<sub>2</sub> at different temperature.

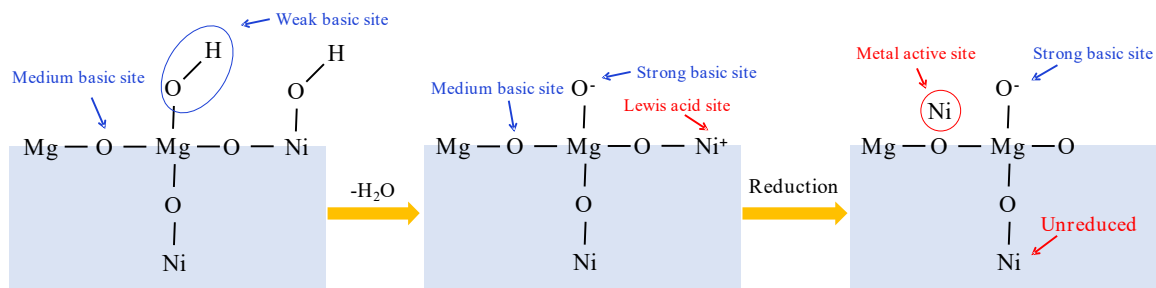

**Fig. S3** The proposed changing mechanisms of structural properties for the Ni/MgO catalyst during preparation process.

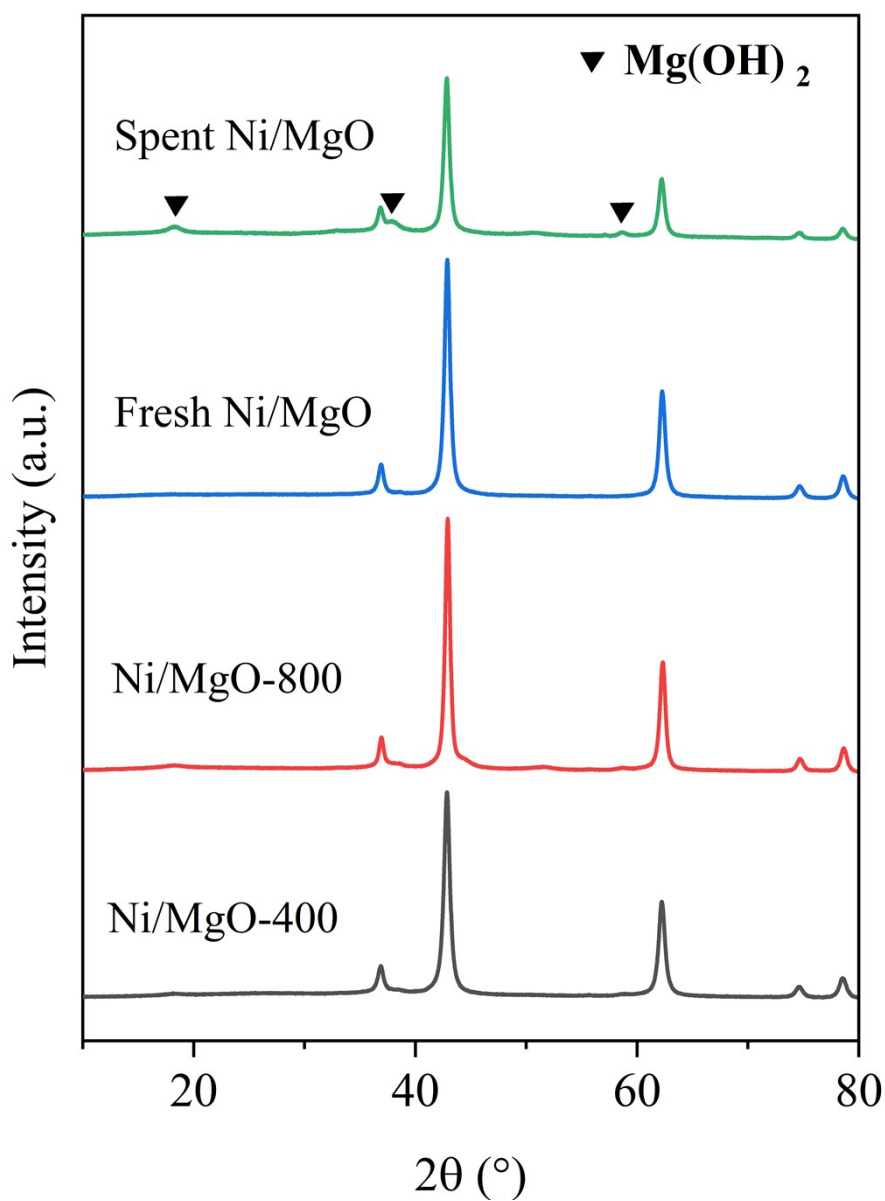

**Fig. S4** XRD patterns of the Ni/MgO catalysts.

## Table

**Table S1** XPS Data for Ni/MgO Catalysts reduced by H<sub>2</sub> at different temperature.

| RT<br>(°C) | Binding energy (eV)/Atomic concentration (%) |                  |                   |                   |                    |                  |                  | Atomic<br>ratio<br>Ni/Mg |
|------------|----------------------------------------------|------------------|-------------------|-------------------|--------------------|------------------|------------------|--------------------------|
|            | C 1s                                         |                  | O 1s              |                   | Mg 1s              | Ni 2p            |                  |                          |
| 400        | 284.9<br>(15.15%)                            | 288.7<br>(4.23%) | 529.4<br>(25.18%) | 530.9<br>(30.94%) | 1303.3<br>(26.67%) | 854.8<br>(0.76%) | 859.8<br>(1.03%) | 0.067                    |
| 600        | 284.9<br>(14.24%)                            | 288.7<br>(3.07%) | 529.4<br>(15.82%) | 530.9<br>(36.39%) | 1303.2<br>(27.91%) | 854.8<br>(1.52%) | 859.8<br>(1.05%) | 0.092                    |
| 800        | 284.9<br>(15.02%)                            | 288.7<br>(2.28%) | 529.4<br>(15.57%) | 530.9<br>(36.27%) | 1303.2<br>(27.92%) | 854.8<br>(1.71%) | 859.8<br>(1.23%) | 0.105                    |

RT: Reduction temperature

**Table S2** The reaction results of FAL hydrogenation to FOL over Ni/MgO with different using amount<sup>a</sup>.

| Entry | Catalyst<br>amount<br>(g) | Conversion<br>(%) | Selectivity of products (%)                                                         |                                                                                     |                                                                                     |                                                                                       |                                                                                       |                     |
|-------|---------------------------|-------------------|-------------------------------------------------------------------------------------|-------------------------------------------------------------------------------------|-------------------------------------------------------------------------------------|---------------------------------------------------------------------------------------|---------------------------------------------------------------------------------------|---------------------|
|       |                           |                   |  |  |  |  |  | others <sup>b</sup> |
| 1     | 0.05                      | 59.2              | 0                                                                                   | 1.9                                                                                 | 97.3                                                                                | 0.3                                                                                   | 0.1                                                                                   | 0.4                 |
| 2     | 0.1                       | 74.1              | 0                                                                                   | 1.5                                                                                 | 96.1                                                                                | 2.0                                                                                   | 0.1                                                                                   | 0.3                 |
| 3     | 0.2                       | 97.7              | 0                                                                                   | 0.9                                                                                 | 94.7                                                                                | 4.1                                                                                   | 0.1                                                                                   | 0.2                 |

<sup>a</sup> Reaction conditions: 1 mL FAL, 40 mL isopropanol, 2 MPa H<sub>2</sub>, 200°C, 2 h, stirred at 700 rpm.

<sup>b</sup> others contain 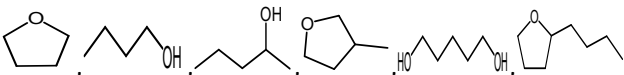

**Table S3** The reaction results of FAL hydrogenation to FOL over Ni/MgO reduced at different temperature<sup>a</sup>.

| Entry | reduction temperature (°C) | Conversion (%) | Selectivity of products (%)                                                       |                                                                                   |                                                                                    |                                                                                     |                                                                                     |                     |
|-------|----------------------------|----------------|-----------------------------------------------------------------------------------|-----------------------------------------------------------------------------------|------------------------------------------------------------------------------------|-------------------------------------------------------------------------------------|-------------------------------------------------------------------------------------|---------------------|
|       |                            |                |  |  |  |  |  | others <sup>b</sup> |
| 1     | 400                        | 70.5           | 0                                                                                 | 0.8                                                                               | 95.7                                                                               | 3.0                                                                                 | 0.2                                                                                 | 0.3                 |
| 2     | 600                        | 97.7           | 0                                                                                 | 0.9                                                                               | 94.7                                                                               | 4.1                                                                                 | 0.1                                                                                 | 0.2                 |
| 3     | 800                        | 76.8           | 0                                                                                 | 0.8                                                                               | 88.1                                                                               | 10.6                                                                                | 0.1                                                                                 | 0.4                 |

<sup>a</sup> Reaction conditions: 1 mL FAL, 0.2 g catalyst, 40 mL isopropanol, 2 MPa H<sub>2</sub>, 200°C, 2 h, stirred at 700 rpm.

<sup>b</sup> others contain 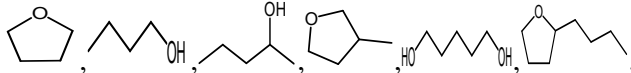.
